# Supplementary material for: UV-A Radiation: Safe Human Exposure and Antibacterial Activity
Source: MDPI journal article supplement (doi:10.3390/ijms24098331), 2023-05-05
Supplement: s1 [file s1]

## Supplementary Materials

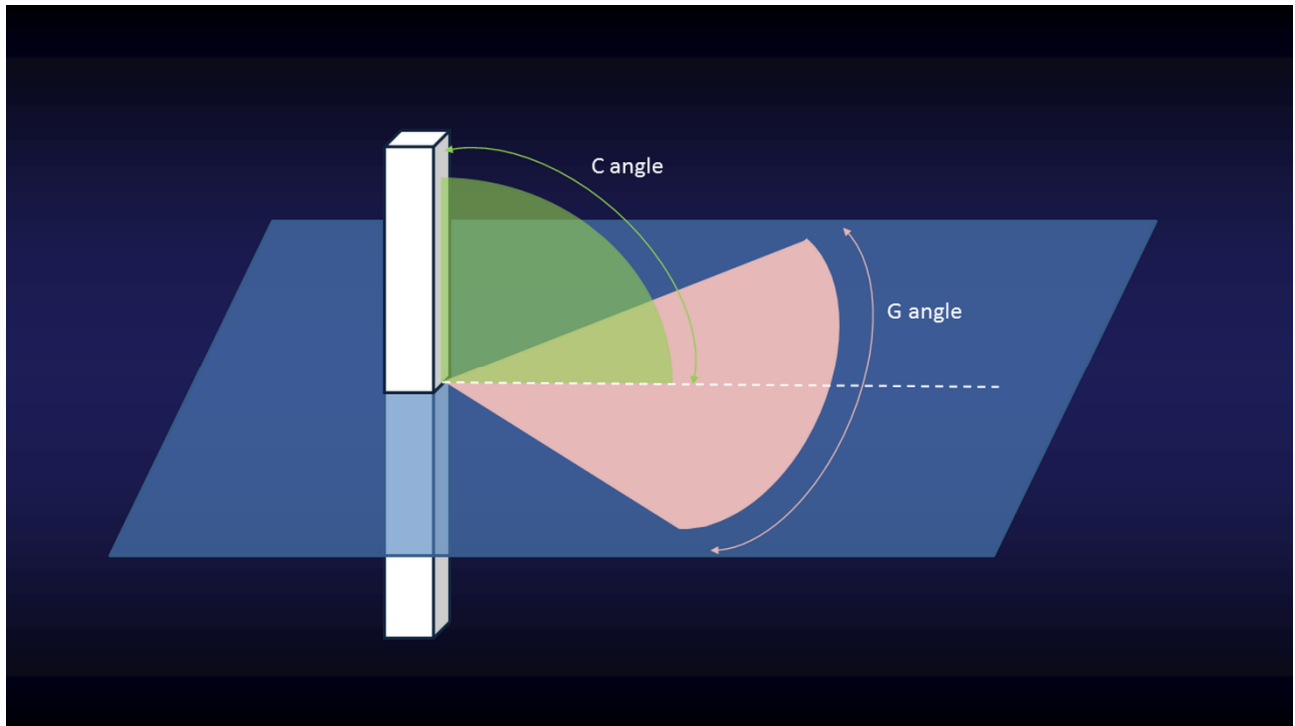

**Figure S1.** Graphical representation of G and C angles with respect to the lamp (white parallelepiped).

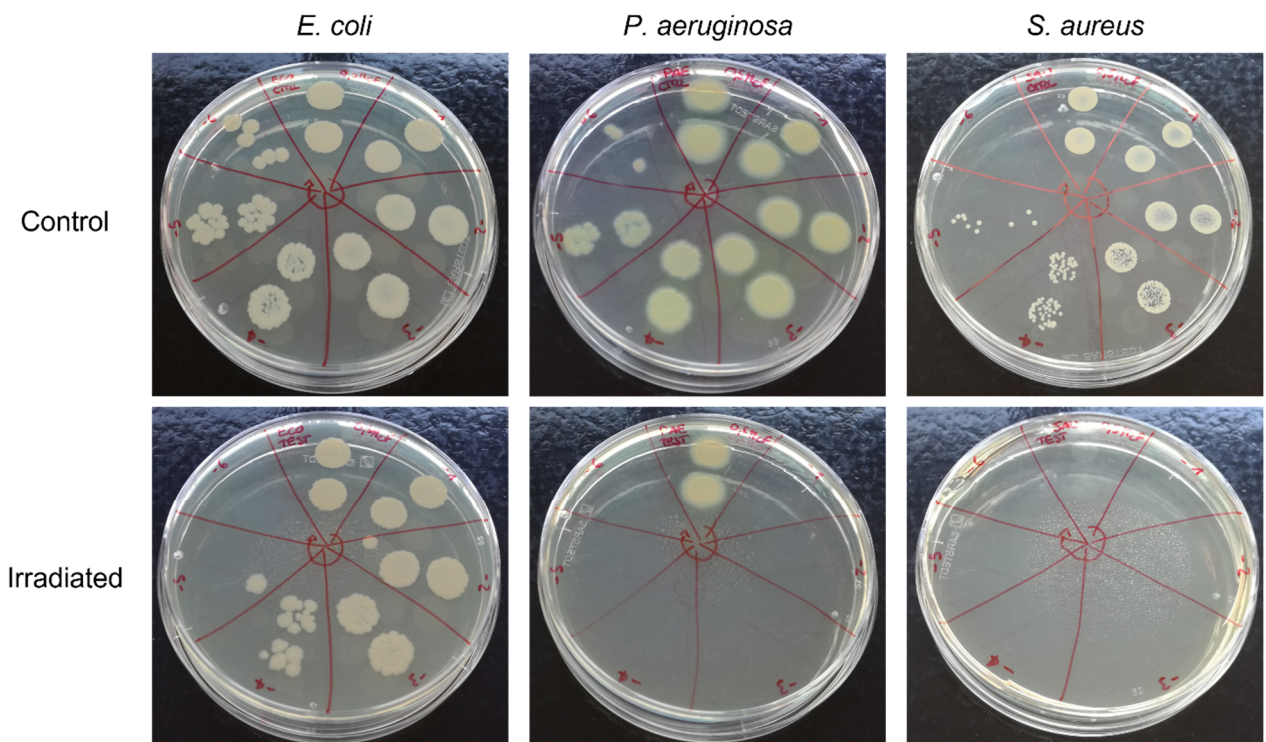

**Figure S2.** Representative pictures of plates irradiated for 24 hours at 1 meter distance from the UV-A source and control plates. Plates were divided in sections containing decreasing dilutions of bacterial suspensions (clockwise); each section contains 2 drops (20  $\mu$ l each) of the appropriate dilution.

**Table S1.** Reduction of bacterial populations at 50 cm distance from the UV-A source.

| Reduction            | 8h     |     | 16h       |     | 24h       |     |
|----------------------|--------|-----|-----------|-----|-----------|-----|
|                      | %      | log | %         | log | %         | log |
| <i>E. coli</i>       | 7.95%  | 0   | 99.99%    | 4   | 99.9999%  | 6   |
| <i>P. aeruginosa</i> | 19.70% | 0   | 99.9999%  | 6   | >99.9999% | 7   |
| <i>S. aureus</i>     | 96.98% | 1   | >99.9999% | 7   | >99.9999% | 7   |

**Table S2.** Reduction of bacterial populations after 24 hours UV-A irradiation.

| Reduction            | 50 cm     |     | 100 cm    |     | 200 cm    |     |
|----------------------|-----------|-----|-----------|-----|-----------|-----|
|                      | %         | log | %         | log | %         | log |
| <i>E. coli</i>       | 99.9999%  | 6   | 97.06%    | 1   | 10.95%    | 0   |
| <i>P. aeruginosa</i> | >99.9999% | 7   | >99.9999% | 6   | >99.9999% | 6   |
| <i>S. aureus</i>     | >99.9999% | 7   | >99.9999% | 7   | >99.9999% | 7   |
